# Supplementary figures and images for: Short-term inhibition of autophagy benefits pancreatic β-cells by augmenting ether lipids and peroxisomal function, and by countering depletion of n-3 polyunsaturated fatty acids after fat-feeding
Source: PubMed Central journal article supplement — Mol Metab. 2020 Jun 3;40:101023. doi: 10.1016/j.molmet.2020.101023 (PMC7322075; doi:10.1016/j.molmet.2020.101023), 2020-06-03

# Supplementary Figure 1

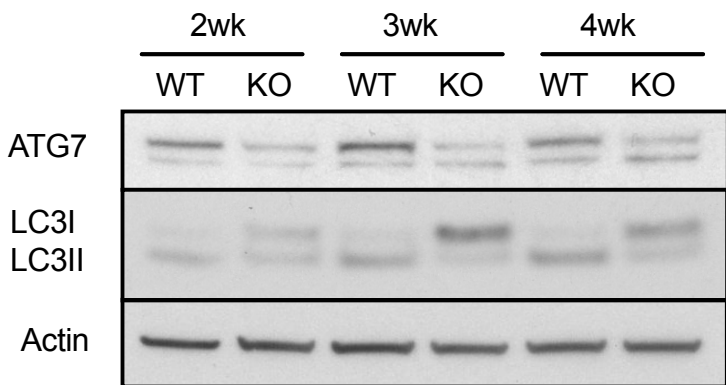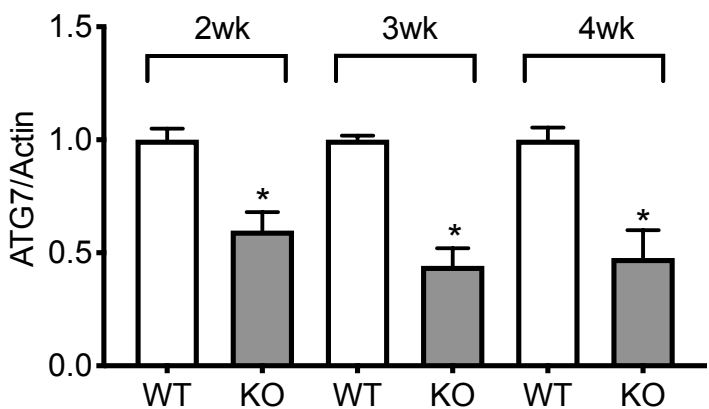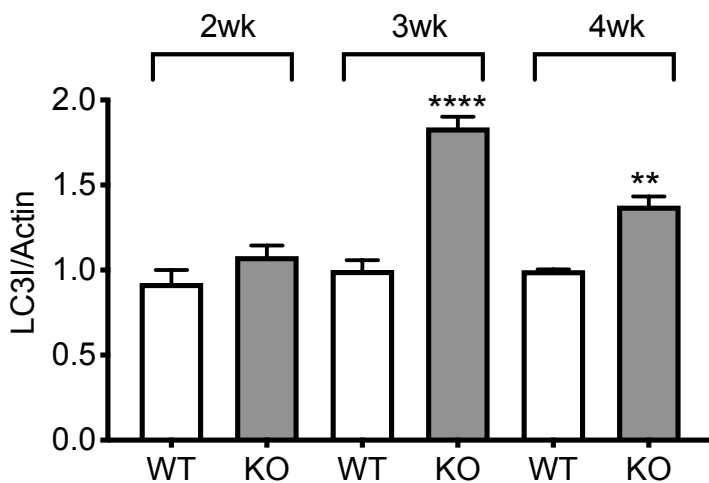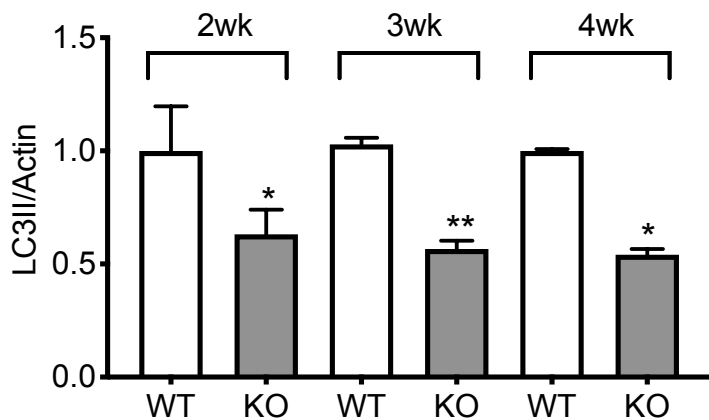

Supplement: mmc1.pdf [file mmc1.pdf]

# Supplementary Figure 3

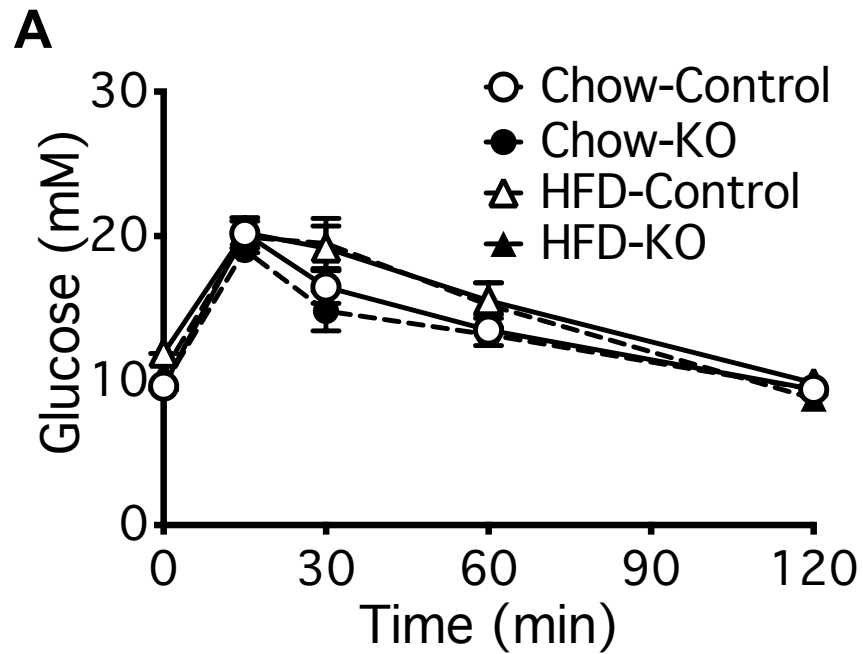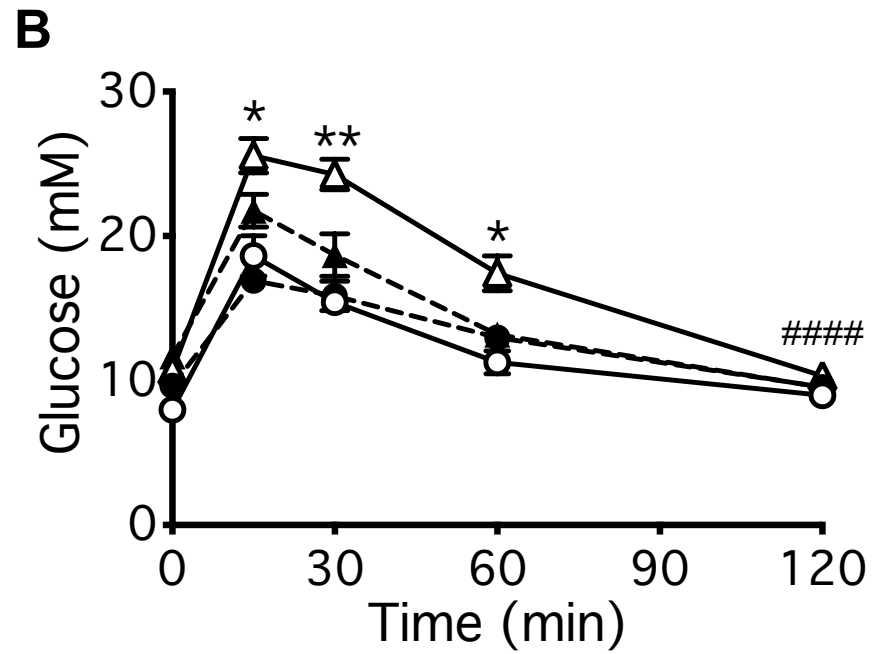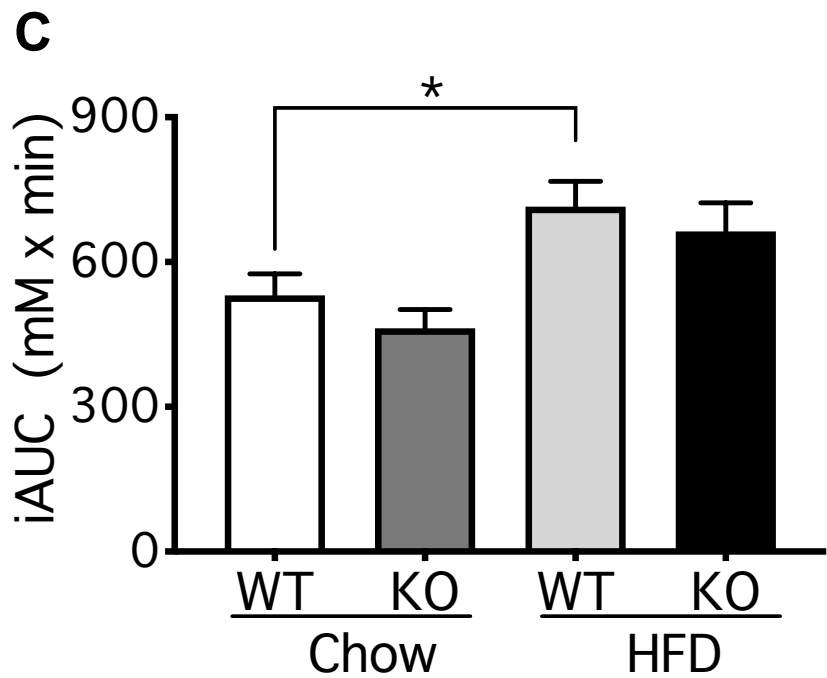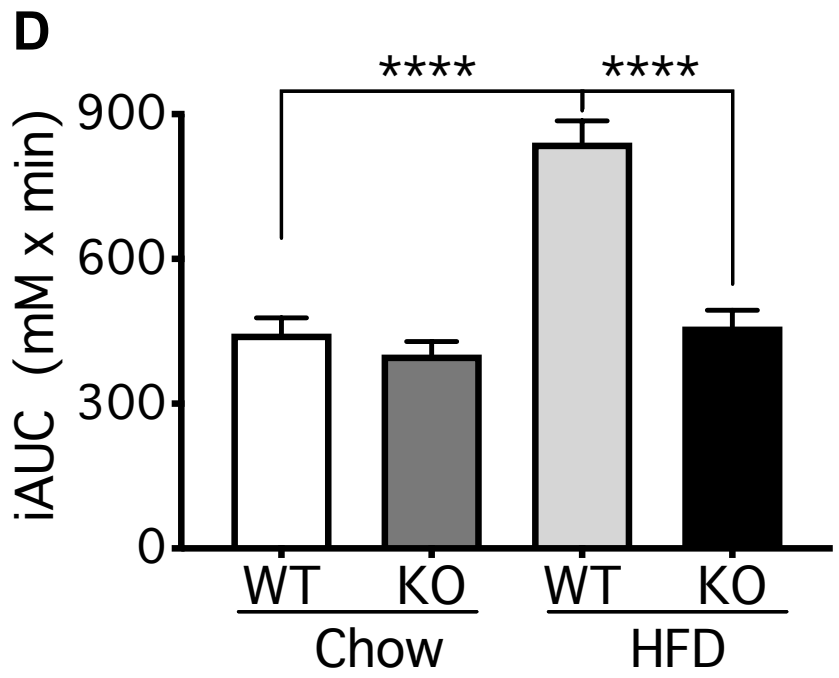

Supplement: mmc3.pdf [file mmc3.pdf]
